# Supplementary material for: Effects of BPA Exposure and Recovery on the Expression of Genes Involved in the Hepatic Lipid Metabolism in Male Mice
Source: MDPI journal article supplement (doi:10.3390/toxics11090775), 2023-09-12
Supplement: s1 [file s1]

## Supporting Information

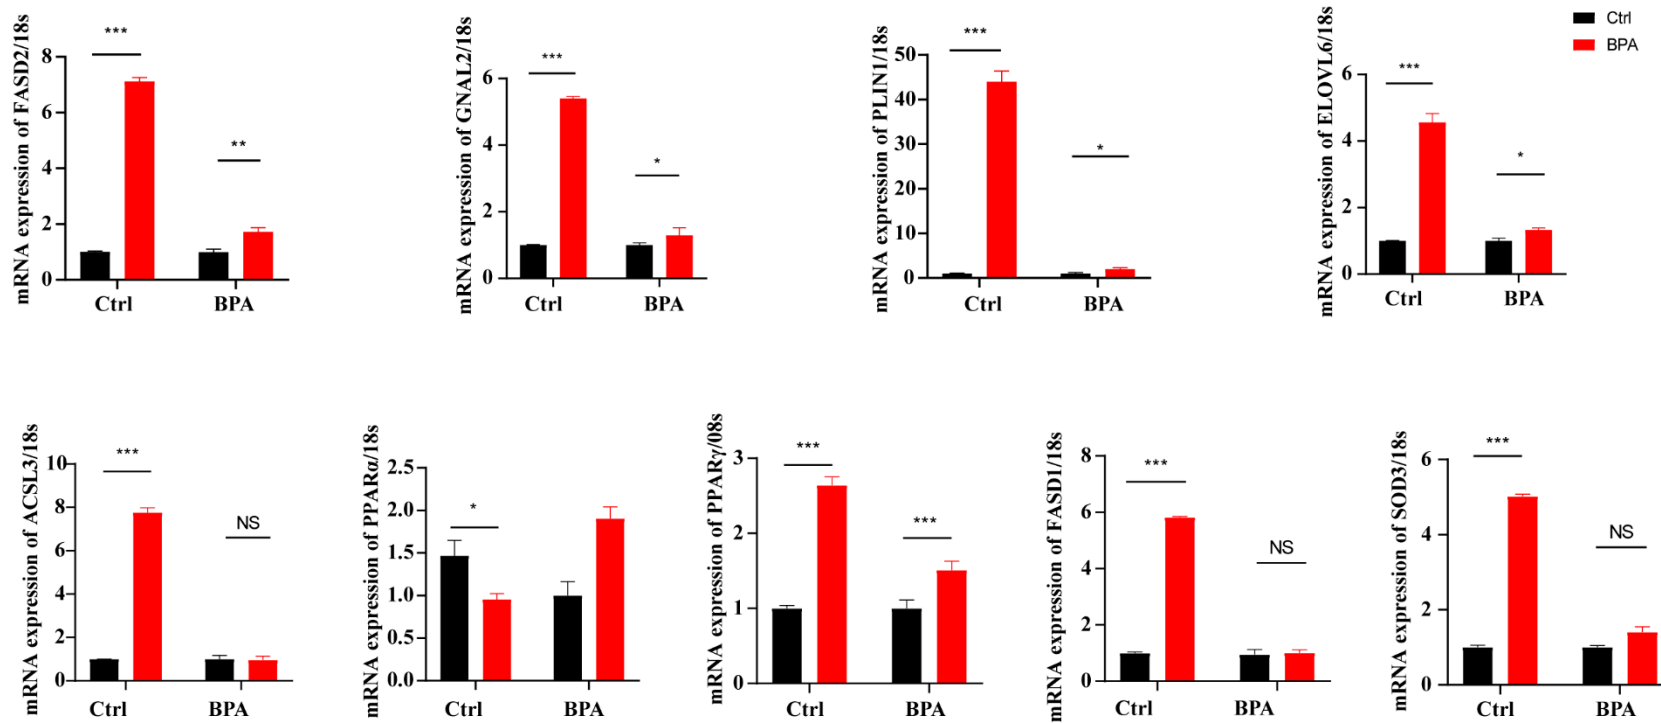

Figure S1. Effects of BPA exposure on the expression of key genes in liver.

\*Represents the significance at  $p < 0.05$ . \*\*Represents the significance at  $p < 0.01$ . \*\*\* Represents the significance at  $p < 0.001$ .

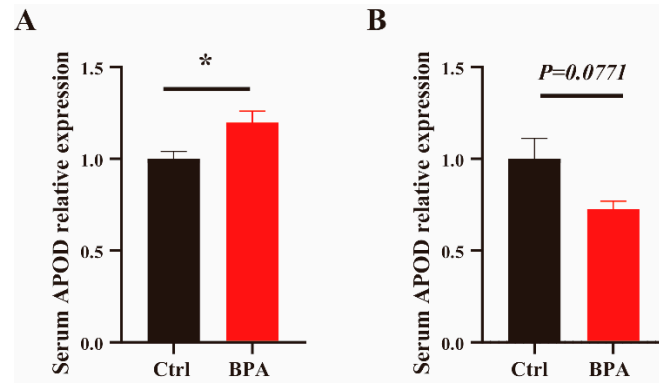

Figure S2. serum APOD levels between comparison groups

Note: (A) APOD levels for 8 weeks; (B) APOD levels for 16 weeks. \*Represents the significance at  $p < 0.05$ .

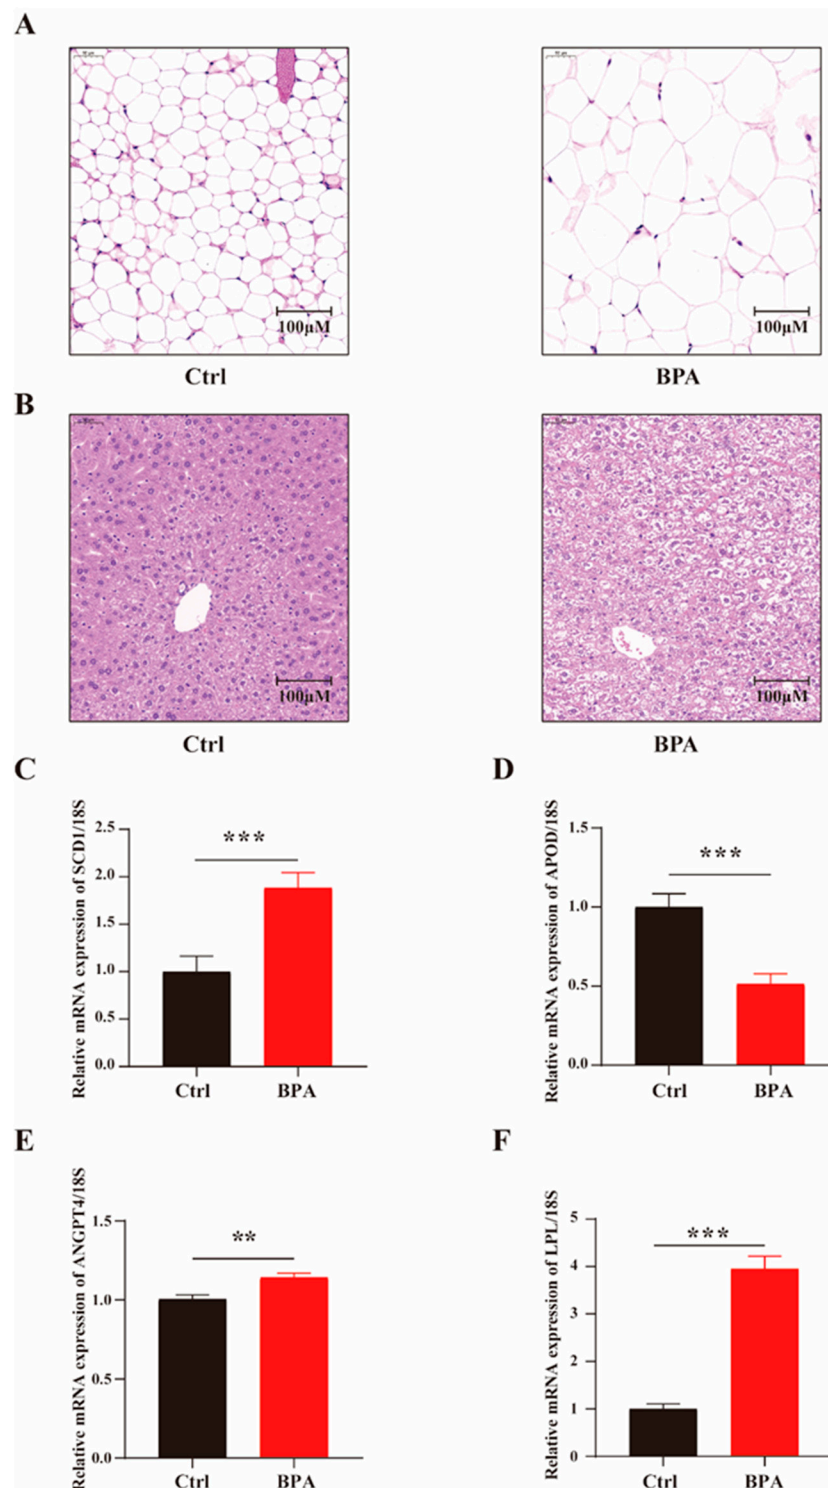

**Figure S3. Effects of 16 weeks of continuous BPA exposure on mice phenotype**

Note: (A) Representative images of adipose tissue stained with H&E in mice; (B) Representative images of liver with H&E in mice; (C)-(F) Effects of BPA on the hepatic mRNA expression of genes regulating lipid metabolism. n=5 in each group; Statistical significance was determined by one-way ANOVA. \*\*Represents the significance at  $p < 0.01$ . \*\*\* Represents the significance at  $p < 0.001$ .

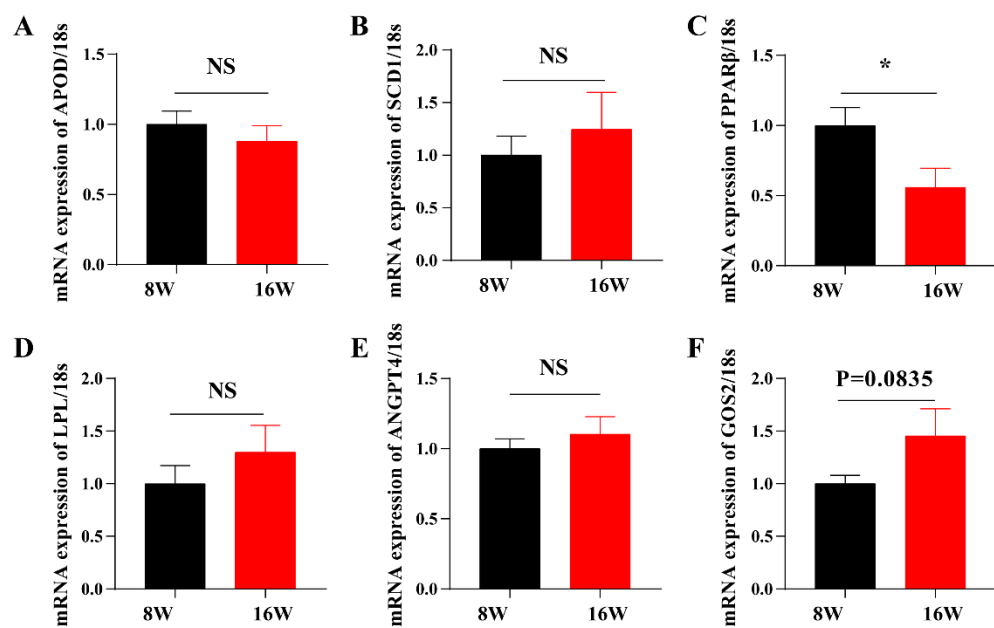

**Figure S4. Effects of age factors on the expression of genes in the mice liver**

**Note:** Statistical significance was determined by one-way ANOVA. \*Represents the significance at  $p < 0.05$ .

Table S1. PCR primers for qRT-PCR validation

| Gene                  | Primers(5'to3') |                          | Products(bp) |
|-----------------------|-----------------|--------------------------|--------------|
| ACSL3(mouse)          | F               | GCGAGAAGGATTCCAAGACTGG   | 125          |
|                       | R               | GAAGAGTAGCCGATTCGGCATC   |              |
| ANGPT4(mouse)         | F               | TACAGCGCCTGGTACGGATTGT   | 94           |
|                       | R               | CGCTTGATCTCTGCACAGTCCT   |              |
| ApoD(mouse)           | F               | TGAACCAAGTAAAGGGTGAAGC   | 134          |
|                       | R               | CACGAGGGCATAGTTTTTCAT    |              |
| ELOVL6(mouse)         | F               | CGGCATCTGATGAACAAGCGAG   | 120          |
|                       | R               | GTACAGCATGTAAGCACCAGTTC  |              |
| FADS1(mouse)          | F               | ACCTGTCAGTCTTTGGCACCTC   | 139          |
|                       | R               | TCCTTGCGGAAGCAGTTAGGCT   |              |
| FADS2(mouse)          | F               | TTCCTGGAGAGCCACTGGTTTG   | 132          |
|                       | R               | GAAGAAGGACTGCTCCACATTGC  |              |
| GNAI2(mouse)          | F               | CAGATCGACTTTGCTGATCCC    | 191          |
|                       | R               | TAAGCGGCTGAGTCATTGAGC    |              |
| G0S2(mouse)           | F               | GCTAGTGAAGCTATACGTGCTGG  | 157          |
|                       | R               | GGACTGCTGTTACACGCTTCC    |              |
| LPL(mouse)            | F               | GTAGCAGGAAGTCTGACCAATAAG | 116          |
|                       | R               | AAATCAGCGTCATCAGGAGA     |              |
| PLIN1(mouse)          | F               | AAGCCTTGTGAGGAGGGTCA     | 522          |
|                       | R               | AGGGCATCGGATAGGGACAT     |              |
| SCD1(mouse)           | F               | TGCTGGGGCGAGACTTTTGT     | 138          |
|                       | R               | GGATTGAATGTTCTTGTCGTAGGG |              |
| SOD3(mouse)           | F               | GACCTGGTTGAGAAGATAGGCG   | 124          |
|                       | R               | TGGCTGATGGTTGTACCCTGCA   |              |
| PPAR $\alpha$ (mouse) | F               | ACCACTACGGAGTTCACGCATG   | 102          |
|                       | R               | GAATCTTGCAGCTCCGATCACAC  |              |
| PPAR $\beta$ (mouse)  | F               | CGCACCTTTGTTCATCCAC      | 120          |
|                       | R               | CTGGCAGCGGTAGAACACG      |              |
| PPAR $\gamma$ (mouse) | F               | CTCCAAGAATACCAAAGTGCGA   | 335          |
|                       | R               | TCGCACTTTGGTATTCTTGGAG   |              |
| $\beta$ -actin(mouse) | F               | CATTGCTGACAGGATGCAGAAGG  | 138          |
|                       | R               | TGCTGGAAGGTGGACAGTGAGG   |              |
